# Supplementary material
Source: Springer Nature journal article supplement (https://www.springermedizin.de/resource/supplementary/12913_2008_918_MOESM3_ESM.pdf/9536446)
Supplement: MOESM3 [file 9536446]

# Example of single item linking to multiple ICF concepts:

## **Cognitive skills for daily decision-making**

Making decisions regarding tasks of daily life—e.g., when to get up or have meals, which clothes to wear or activities to do.

0. Independent—Decisions consistent, reasonable, and safe
1. Modified independence—Some difficulty in new situations only
2. Minimally impaired—In specific recurring situations, decisions become poor or unsafe; cues/supervision necessary at those times
3. Moderately impaired—Decisions consistently poor or unsafe; cues/supervision required at all times
4. Severely impaired—Never or rarely makes decisions
5. No discernible consciousness, coma

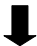

As worded above, a single item can address more than one domain

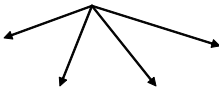

b110 consciousness functions

d177 making decisions

b164 higher-level cognitive functions

d230 carrying out daily routine
